# Supplementary material
Source: publisher figshare collection journal article supplement (https://acs.figshare.com/ndownloader/files/4489864)
Supplement: Supplementary file 1 [file 4489864]

 
data_d09024 
  
_audit_creation_method            SHELXL-97 
_chemical_name_systematic 
; 
 ? 
; 
_chemical_name_common             ? 
_chemical_melting_point           ? 
_chemical_formula_moiety          ? 
_chemical_formula_sum 
 'C22 H20 O2' 
_chemical_formula_weight          316.38 
_chemical_absolute_configuration  ad
  
loop_ 
 _atom_type_symbol 
 _atom_type_description 
 _atom_type_scat_dispersion_real 
 _atom_type_scat_dispersion_imag 
 _atom_type_scat_source 
 'C'  'C'   0.0181   0.0091 
 'International Tables Vol C Tables 4.2.6.8 and 6.1.1.4' 
 'H'  'H'   0.0000   0.0000 
 'International Tables Vol C Tables 4.2.6.8 and 6.1.1.4' 
 'O'  'O'   0.0492   0.0322 
 'International Tables Vol C Tables 4.2.6.8 and 6.1.1.4' 
  
_symmetry_cell_setting            Monoclinic 
_symmetry_space_group_name_H-M    P2(1) 
  
loop_ 
 _symmetry_equiv_pos_as_xyz 
 'x, y, z' 
 '-x, y+1/2, -z' 
  
_cell_length_a                    5.5286(2) 
_cell_length_b                    7.7518(3) 
_cell_length_c                    19.4144(6) 
_cell_angle_alpha                 90.00 
_cell_angle_beta                  91.466(2) 
_cell_angle_gamma                 90.00 
_cell_volume                      831.76(5) 
_cell_formula_units_Z             2 
_cell_measurement_temperature     100(2) 
_cell_measurement_reflns_used     4596 
_cell_measurement_theta_min       4.56 
_cell_measurement_theta_max       68.43 
  
_exptl_crystal_description        plate 
_exptl_crystal_colour             colourless 
_exptl_crystal_size_max           0.47 
_exptl_crystal_size_mid           0.25 
_exptl_crystal_size_min           0.10 
_exptl_crystal_density_meas       ? 
_exptl_crystal_density_diffrn     1.263 
_exptl_crystal_density_method     'not measured' 
_exptl_crystal_F_000              336 
_exptl_absorpt_coefficient_mu     0.625 
_exptl_absorpt_correction_type    multi-scan 
_exptl_absorpt_correction_T_min   0.7577 
_exptl_absorpt_correction_T_max   0.9401 
_exptl_absorpt_process_details    'SADABS (Sheldrick, 2008)' 
  
_exptl_special_details 
; 
 'Bruker three-circle diffractometer, Bruker APEX CCD' 
; 
  
_diffrn_ambient_temperature       100(2) 
_diffrn_radiation_wavelength      1.54178 
_diffrn_radiation_type            CuK\a 
_diffrn_radiation_source          'fine-focus sealed tube' 
_diffrn_radiation_monochromator   graphite 
_diffrn_measurement_device_type   'Bruker Smart APEX CCD' 
_diffrn_measurement_method        'omega and phi scans' 
_diffrn_detector_area_resol_mean  8.3 
_diffrn_reflns_number             3125 
_diffrn_reflns_av_R_equivalents   0.0583 
_diffrn_reflns_av_sigmaI/netI     0.0366 
_diffrn_reflns_limit_h_min        -6 
_diffrn_reflns_limit_h_max        6 
_diffrn_reflns_limit_k_min        -9 
_diffrn_reflns_limit_k_max        9 
_diffrn_reflns_limit_l_min        -23 
_diffrn_reflns_limit_l_max        23 
_diffrn_reflns_theta_min          2.28 
_diffrn_reflns_theta_max          67.68 
_reflns_number_total              3128 
_reflns_number_gt                 3057 
_reflns_threshold_expression      >2sigma(I) 
  
_computing_data_collection        'APEX2 3.0 (Bruker-AXS, 2008)' 
_computing_cell_refinement        'SAINT 7.46A (Bruker-AXS, 2008)' 
_computing_data_reduction         'SAINT 7.46A (Bruker-AXS, 2008)' 
_computing_structure_solution     'SHELXS-97 (Sheldrick, 2008)' 
_computing_structure_refinement   'SHELXL-97 (Sheldrick, 2008)' 
_computing_molecular_graphics     'Bruker SHELXTL' 
_computing_publication_material   'Bruker SHELXTL' 
  
_refine_special_details 
; 
 Refinement of F^2^ against ALL reflections.  The weighted R-factor wR and 
 goodness of fit S are based on F^2^, conventional R-factors R are based 
 on F, with F set to zero for negative F^2^. The threshold expression of 
 F^2^ > 2sigma(F^2^) is used only for calculating R-factors(gt) etc. and is 
 not relevant to the choice of reflections for refinement.  R-factors based 
 on F^2^ are statistically about twice as large as those based on F, and R- 
 factors based on ALL data will be even larger. 
; 
  
_refine_ls_structure_factor_coef  Fsqd 
_refine_ls_matrix_type            full 
_refine_ls_weighting_scheme       calc 
_refine_ls_weighting_details 
 'calc w=1/[\s^2^(Fo^2^)+(0.0605P)^2^+0.1754P] where P=(Fo^2^+2Fc^2^)/3' 
_atom_sites_solution_primary      direct 
_atom_sites_solution_secondary    difmap 
_atom_sites_solution_hydrogens    geom 
_refine_ls_hydrogen_treatment     constr 
_refine_ls_extinction_method      none 
_refine_ls_extinction_coef        ? 
_refine_ls_abs_structure_details 
 'Flack H D (1983), Acta Cryst. A39, 876-881' 
_refine_ls_abs_structure_Flack    0.1(2) 
_refine_ls_number_reflns          3128 
_refine_ls_number_parameters      219 
_refine_ls_number_restraints      217 
_refine_ls_R_factor_all           0.0385 
_refine_ls_R_factor_gt            0.0376 
_refine_ls_wR_factor_ref          0.1049 
_refine_ls_wR_factor_gt           0.1044 
_refine_ls_goodness_of_fit_ref    1.055 
_refine_ls_restrained_S_all       1.019 
_refine_ls_shift/su_max           0.000 
_refine_ls_shift/su_mean          0.000 
  
loop_ 
 _atom_site_label 
 _atom_site_type_symbol 
 _atom_site_fract_x 
 _atom_site_fract_y 
 _atom_site_fract_z 
 _atom_site_U_iso_or_equiv 
 _atom_site_adp_type 
 _atom_site_occupancy 
 _atom_site_symmetry_multiplicity 
 _atom_site_calc_flag 
 _atom_site_refinement_flags 
 _atom_site_disorder_assembly 
 _atom_site_disorder_group 
O1 O 0.3470(2) 0.02072(18) 0.05252(6) 0.0285(3) Uani 1 1 d U . . 
O2 O 0.7633(2) 0.0206(2) 0.35782(7) 0.0351(3) Uani 1 1 d U . . 
C1 C 0.1321(3) 0.0951(3) 0.02324(10) 0.0295(4) Uani 1 1 d U . . 
H1A H 0.1302 0.2205 0.0328 0.035 Uiso 1 1 calc R . . 
H1B H -0.0112 0.0428 0.0445 0.035 Uiso 1 1 calc R . . 
C2 C 0.1205(3) 0.0652(2) -0.05331(9) 0.0263(4) Uani 1 1 d U . . 
C3 C -0.0775(3) 0.1343(3) -0.09053(10) 0.0295(4) Uani 1 1 d U . . 
H3 H -0.1987 0.1962 -0.0671 0.035 Uiso 1 1 calc R . . 
C4 C -0.0975(3) 0.1130(3) -0.16109(10) 0.0297(4) Uani 1 1 d U . . 
H4 H -0.2327 0.1600 -0.1857 0.036 Uiso 1 1 calc R . . 
C5 C 0.0781(3) 0.0238(3) -0.19623(10) 0.0299(4) Uani 1 1 d U . . 
H5 H 0.0648 0.0105 -0.2448 0.036 Uiso 1 1 calc R . . 
C6 C 0.2742(3) -0.0462(3) -0.15952(10) 0.0301(4) Uani 1 1 d U . . 
H6 H 0.3948 -0.1081 -0.1833 0.036 Uiso 1 1 calc R . . 
C7 C 0.2951(3) -0.0264(2) -0.08848(9) 0.0291(4) Uani 1 1 d U . . 
H7 H 0.4289 -0.0756 -0.0639 0.035 Uiso 1 1 calc R . . 
C8 C 0.3805(3) 0.0328(2) 0.12219(9) 0.0251(4) Uani 1 1 d U . . 
C9 C 0.2213(3) 0.1155(2) 0.16601(9) 0.0267(4) Uani 1 1 d U . . 
H9 H 0.0774 0.1672 0.1479 0.032 Uiso 1 1 calc R . . 
C10 C 0.2748(3) 0.1215(2) 0.23616(9) 0.0272(4) Uani 1 1 d U . . 
H10 H 0.1625 0.1734 0.2661 0.033 Uiso 1 1 calc R . . 
C11 C 0.4895(3) 0.0532(2) 0.26387(9) 0.0261(4) Uani 1 1 d U . . 
C12 C 0.6452(3) -0.0311(2) 0.21883(9) 0.0264(4) Uani 1 1 d U . . 
H12 H 0.7908 -0.0810 0.2367 0.032 Uiso 1 1 calc R . . 
C13 C 0.5916(3) -0.0431(2) 0.14940(9) 0.0279(4) Uani 1 1 d U . . 
H13 H 0.6978 -0.1029 0.1200 0.033 Uiso 1 1 calc R . . 
C14 C 0.5626(3) 0.0671(2) 0.33825(10) 0.0277(4) Uani 1 1 d U . . 
C15 C 0.3823(3) 0.1397(2) 0.38932(9) 0.0284(4) Uani 1 1 d U . . 
H15 H 0.2259 0.0767 0.3819 0.034 Uiso 1 1 calc R . . 
C16 C 0.3329(3) 0.3315(3) 0.37733(9) 0.0275(4) Uani 1 1 d U . . 
C17 C 0.1185(3) 0.4026(3) 0.40156(10) 0.0313(4) Uani 1 1 d U . . 
H17 H 0.0074 0.3315 0.4250 0.038 Uiso 1 1 calc R . . 
C18 C 0.0669(3) 0.5765(3) 0.39165(10) 0.0335(4) Uani 1 1 d U . . 
H18 H -0.0777 0.6241 0.4090 0.040 Uiso 1 1 calc R . . 
C19 C 0.2256(3) 0.6807(3) 0.35651(10) 0.0338(4) Uani 1 1 d U . . 
H19 H 0.1884 0.7988 0.3486 0.041 Uiso 1 1 calc R . . 
C20 C 0.4387(4) 0.6113(3) 0.33311(10) 0.0332(4) Uani 1 1 d U . . 
H20 H 0.5495 0.6824 0.3095 0.040 Uiso 1 1 calc R . . 
C21 C 0.4917(3) 0.4381(3) 0.34391(9) 0.0292(4) Uani 1 1 d U . . 
H21 H 0.6396 0.3923 0.3280 0.035 Uiso 1 1 calc R . . 
C22 C 0.4683(4) 0.1068(3) 0.46364(10) 0.0380(5) Uani 1 1 d U . . 
H22A H 0.3467 0.1495 0.4953 0.057 Uiso 1 1 calc R . . 
H22B H 0.6217 0.1672 0.4725 0.057 Uiso 1 1 calc R . . 
H22C H 0.4918 -0.0173 0.4708 0.057 Uiso 1 1 calc R . . 
  
loop_ 
 _atom_site_aniso_label 
 _atom_site_aniso_U_11 
 _atom_site_aniso_U_22 
 _atom_site_aniso_U_33 
 _atom_site_aniso_U_23 
 _atom_site_aniso_U_13 
 _atom_site_aniso_U_12 
O1 0.0262(6) 0.0330(7) 0.0263(6) -0.0011(5) 0.0029(4) 0.0033(6) 
O2 0.0323(6) 0.0386(8) 0.0342(7) -0.0018(6) -0.0031(5) 0.0031(6) 
C1 0.0256(8) 0.0322(10) 0.0309(9) -0.0011(8) 0.0040(7) 0.0026(8) 
C2 0.0227(8) 0.0252(9) 0.0312(9) 0.0015(7) 0.0044(6) -0.0045(7) 
C3 0.0255(9) 0.0282(9) 0.0349(10) 0.0000(8) 0.0045(7) 0.0002(8) 
C4 0.0233(8) 0.0311(9) 0.0347(10) 0.0023(8) -0.0001(7) 0.0011(8) 
C5 0.0295(8) 0.0324(10) 0.0279(9) -0.0001(8) 0.0021(7) -0.0040(8) 
C6 0.0285(9) 0.0312(10) 0.0307(9) -0.0012(8) 0.0065(7) 0.0015(8) 
C7 0.0243(8) 0.0312(10) 0.0317(10) 0.0021(8) 0.0005(7) 0.0015(8) 
C8 0.0248(8) 0.0227(8) 0.0279(8) -0.0003(7) 0.0029(6) -0.0029(7) 
C9 0.0209(8) 0.0268(9) 0.0324(9) -0.0009(8) 0.0013(6) -0.0001(8) 
C10 0.0231(8) 0.0268(8) 0.0319(9) -0.0033(8) 0.0059(7) -0.0022(7) 
C11 0.0239(8) 0.0243(9) 0.0303(9) -0.0004(7) 0.0044(6) -0.0047(7) 
C12 0.0210(8) 0.0244(9) 0.0337(9) 0.0023(7) 0.0003(6) 0.0017(7) 
C13 0.0255(8) 0.0265(9) 0.0320(9) -0.0004(8) 0.0074(7) 0.0004(8) 
C14 0.0267(9) 0.0221(9) 0.0343(10) 0.0019(7) 0.0006(7) -0.0017(8) 
C15 0.0298(9) 0.0297(10) 0.0258(9) 0.0009(7) 0.0019(7) -0.0054(8) 
C16 0.0287(9) 0.0332(10) 0.0202(8) -0.0042(7) -0.0037(6) -0.0014(7) 
C17 0.0281(10) 0.0380(10) 0.0279(10) -0.0025(8) 0.0017(7) -0.0044(8) 
C18 0.0280(9) 0.0365(11) 0.0358(10) -0.0096(8) -0.0012(7) 0.0032(8) 
C19 0.0360(10) 0.0284(9) 0.0366(10) -0.0041(8) -0.0052(8) 0.0034(8) 
C20 0.0330(9) 0.0317(10) 0.0348(10) 0.0005(8) 0.0004(7) -0.0042(8) 
C21 0.0250(9) 0.0331(10) 0.0294(9) -0.0029(7) 0.0003(7) 0.0012(8) 
C22 0.0466(11) 0.0391(11) 0.0284(10) 0.0063(8) 0.0036(8) 0.0034(10) 
  
_geom_special_details 
; 
 All esds (except the esd in the dihedral angle between two l.s. planes) 
 are estimated using the full covariance matrix.  The cell esds are taken 
 into account individually in the estimation of esds in distances, angles 
 and torsion angles; correlations between esds in cell parameters are only 
 used when they are defined by crystal symmetry.  An approximate (isotropic) 
 treatment of cell esds is used for estimating esds involving l.s. planes. 
; 
  
loop_ 
 _geom_bond_atom_site_label_1 
 _geom_bond_atom_site_label_2 
 _geom_bond_distance 
 _geom_bond_site_symmetry_2 
 _geom_bond_publ_flag 
O1 C8 1.364(2) . ? 
O1 C1 1.425(2) . ? 
O2 C14 1.218(2) . ? 
C1 C2 1.504(2) . ? 
C1 H1A 0.9900 . ? 
C1 H1B 0.9900 . ? 
C2 C7 1.391(2) . ? 
C2 C3 1.403(3) . ? 
C3 C4 1.381(3) . ? 
C3 H3 0.9500 . ? 
C4 C5 1.386(3) . ? 
C4 H4 0.9500 . ? 
C5 C6 1.392(3) . ? 
C5 H5 0.9500 . ? 
C6 C7 1.390(2) . ? 
C6 H6 0.9500 . ? 
C7 H7 0.9500 . ? 
C8 C9 1.395(2) . ? 
C8 C13 1.399(2) . ? 
C9 C10 1.387(2) . ? 
C9 H9 0.9500 . ? 
C10 C11 1.395(3) . ? 
C10 H10 0.9500 . ? 
C11 C12 1.404(2) . ? 
C11 C14 1.493(2) . ? 
C12 C13 1.376(2) . ? 
C12 H12 0.9500 . ? 
C13 H13 0.9500 . ? 
C14 C15 1.531(2) . ? 
C15 C16 1.529(3) . ? 
C15 C22 1.529(2) . ? 
C15 H15 1.0000 . ? 
C16 C21 1.380(3) . ? 
C16 C17 1.400(3) . ? 
C17 C18 1.390(3) . ? 
C17 H17 0.9500 . ? 
C18 C19 1.385(3) . ? 
C18 H18 0.9500 . ? 
C19 C20 1.382(3) . ? 
C19 H19 0.9500 . ? 
C20 C21 1.389(3) . ? 
C20 H20 0.9500 . ? 
C21 H21 0.9500 . ? 
C22 H22A 0.9800 . ? 
C22 H22B 0.9800 . ? 
C22 H22C 0.9800 . ? 
  
loop_ 
 _geom_angle_atom_site_label_1 
 _geom_angle_atom_site_label_2 
 _geom_angle_atom_site_label_3 
 _geom_angle 
 _geom_angle_site_symmetry_1 
 _geom_angle_site_symmetry_3 
 _geom_angle_publ_flag 
C8 O1 C1 117.30(13) . . ? 
O1 C1 C2 110.24(14) . . ? 
O1 C1 H1A 109.6 . . ? 
C2 C1 H1A 109.6 . . ? 
O1 C1 H1B 109.6 . . ? 
C2 C1 H1B 109.6 . . ? 
H1A C1 H1B 108.1 . . ? 
C7 C2 C3 118.97(16) . . ? 
C7 C2 C1 123.44(15) . . ? 
C3 C2 C1 117.60(15) . . ? 
C4 C3 C2 120.43(17) . . ? 
C4 C3 H3 119.8 . . ? 
C2 C3 H3 119.8 . . ? 
C3 C4 C5 120.58(16) . . ? 
C3 C4 H4 119.7 . . ? 
C5 C4 H4 119.7 . . ? 
C4 C5 C6 119.26(17) . . ? 
C4 C5 H5 120.4 . . ? 
C6 C5 H5 120.4 . . ? 
C7 C6 C5 120.59(17) . . ? 
C7 C6 H6 119.7 . . ? 
C5 C6 H6 119.7 . . ? 
C6 C7 C2 120.16(16) . . ? 
C6 C7 H7 119.9 . . ? 
C2 C7 H7 119.9 . . ? 
O1 C8 C9 124.35(15) . . ? 
O1 C8 C13 115.89(15) . . ? 
C9 C8 C13 119.75(16) . . ? 
C10 C9 C8 119.48(15) . . ? 
C10 C9 H9 120.3 . . ? 
C8 C9 H9 120.3 . . ? 
C9 C10 C11 121.59(16) . . ? 
C9 C10 H10 119.2 . . ? 
C11 C10 H10 119.2 . . ? 
C10 C11 C12 117.75(16) . . ? 
C10 C11 C14 123.50(16) . . ? 
C12 C11 C14 118.74(16) . . ? 
C13 C12 C11 121.43(16) . . ? 
C13 C12 H12 119.3 . . ? 
C11 C12 H12 119.3 . . ? 
C12 C13 C8 119.90(16) . . ? 
C12 C13 H13 120.0 . . ? 
C8 C13 H13 120.0 . . ? 
O2 C14 C11 120.13(16) . . ? 
O2 C14 C15 120.64(17) . . ? 
C11 C14 C15 119.22(14) . . ? 
C16 C15 C22 110.84(15) . . ? 
C16 C15 C14 112.08(15) . . ? 
C22 C15 C14 110.98(15) . . ? 
C16 C15 H15 107.6 . . ? 
C22 C15 H15 107.6 . . ? 
C14 C15 H15 107.6 . . ? 
C21 C16 C17 118.45(18) . . ? 
C21 C16 C15 122.75(16) . . ? 
C17 C16 C15 118.81(16) . . ? 
C18 C17 C16 120.55(18) . . ? 
C18 C17 H17 119.7 . . ? 
C16 C17 H17 119.7 . . ? 
C19 C18 C17 120.21(18) . . ? 
C19 C18 H18 119.9 . . ? 
C17 C18 H18 119.9 . . ? 
C20 C19 C18 119.41(19) . . ? 
C20 C19 H19 120.3 . . ? 
C18 C19 H19 120.3 . . ? 
C19 C20 C21 120.3(2) . . ? 
C19 C20 H20 119.8 . . ? 
C21 C20 H20 119.8 . . ? 
C16 C21 C20 121.06(18) . . ? 
C16 C21 H21 119.5 . . ? 
C20 C21 H21 119.5 . . ? 
C15 C22 H22A 109.5 . . ? 
C15 C22 H22B 109.5 . . ? 
H22A C22 H22B 109.5 . . ? 
C15 C22 H22C 109.5 . . ? 
H22A C22 H22C 109.5 . . ? 
H22B C22 H22C 109.5 . . ? 
  
_diffrn_measured_fraction_theta_max    0.998 
_diffrn_reflns_theta_full              67.68 
_diffrn_measured_fraction_theta_full   0.998 
_refine_diff_density_max    0.210 
_refine_diff_density_min   -0.151 
_refine_diff_density_rms    0.036 
